# Supplementary material
Source: PubMed Central journal article supplement (PMC9515230)
Supplement: mmc5.pdf [file mmc5.pdf]

# Activation of TMEM16F by inner gate charged mutations and possible lipid/ion permeation mechanisms

Zhiguang Jia,<sup>1</sup> Jian Huang,<sup>1</sup> and Jianhan Chen<sup>1,2,\*</sup>

<sup>1</sup>Department of Chemistry, University of Massachusetts, Amherst, Massachusetts and <sup>2</sup>Department of Biochemistry and Molecular Biology, University of Massachusetts, Amherst, Massachusetts

**ABSTRACT** Transmembrane protein 16F (TMEM16F) is a ubiquitously expressed  $\text{Ca}^{2+}$ -activated phospholipid scramblase that also functions as a largely non-selective ion channel. Though recent structural studies have revealed the closed and intermediate conformations of mammalian TMEM16F (mTMEM16F), the open and conductive state remains elusive. Instead, it has been proposed that an open hydrophilic pathway may not be required for lipid scrambling. We previously identified an inner activation gate, consisting of F518, Y563, and I612, and showed that charged mutations of the inner gate residues led to constitutively active mTMEM16F scrambling. Herein, atomistic simulations show that lysine substitution of F518 and Y563 can indeed lead to spontaneous opening of the permeation pore in the  $\text{Ca}^{2+}$ -bound state of mTMEM16F. Dilatation of the pore exposes hydrophilic patches in the upper pore region, greatly increases the pore hydration level, and enables lipid scrambling. The putative open state of mTMEM16F resembles the active state of fungal scramblases and is a meta-stable state for the wild-type protein in the  $\text{Ca}^{2+}$ -bound state. Therefore, mTMEM16F may be capable of supporting the canonical in-groove scrambling mechanism in addition to the out-of-groove one. Further analysis reveals that the in-groove phospholipid and ion transduction pathways of mTMEM16F overlap from the intracellular side up to the inner gate but diverge from each other with different exits to the extracellular side of membrane.

**SIGNIFICANCE** Transmembrane protein 16F (TMEM16F) plays important roles in regulation of membrane asymmetry and associated physiological processes. Extensive structure determination efforts have failed to capture a conductive state of the protein, hindering our understanding of TMEM16F activation and its dual functionality as both lipid scramblase and ion channel. A previous study discovered that mutations of inner activation gate residues to charged ones led to constitutively active scramblases. Leveraging this discovery, we performed atomistic simulations and identified a possible open and conductive state of TMEM16F in the  $\text{Ca}^{2+}$ -bound state. Further analysis provides important new insights into the activation mechanism of TMEM16F and possible molecular basis of its lipid scramblase and ion channel function.

## INTRODUCTION

The distribution of various lipids in the plasma membrane in eukaryotes is tightly regulated by ATP-driven flippases and floppases, which catalyze lipid movements between two leaflets to generate and maintain asymmetric lipid distributions (1). Breakdown of lipid asymmetry is a key signaling mechanism involved in many physiological processes, including phagocytosis, blood coagulation, bone development, and

viral infection (2–4). For example, externalization of signaling lipid phosphatidylserine disrupts cellular homeostasis and is essential for blood coagulation (5,6). Phospholipid scramblases are lipid channel proteins that promote passive phospholipid scrambling between two leaflets for regulated breakdown of lipid asymmetry (7,8). Transmembrane protein 16F (TMEM16) and Xkr families have been identified as the two major classes of scramblases that respond to intracellular  $\text{Ca}^{2+}$  concentration increase and caspase-3 cleavage, respectively (7,9–11). The TMEM16 family, also known as anoctamins or ANOs, consists of both  $\text{Ca}^{2+}$ -activated  $\text{Cl}^-$  channels (CaCCs), such as TMEM16A and -B, and  $\text{Ca}^{2+}$ -activated phospholipid scramblases, such as TMEM16C–F, -G, -J, and -K (7,12–20).

Submitted January 26, 2022, and accepted for publication August 12, 2022.

\*Correspondence: [jianhanc@umass.edu](mailto:jianhanc@umass.edu)

Zhiguang Jia and Jian Huang contributed equally to this work.

Editor: Philip Biggin.

<https://doi.org/10.1016/j.bpj.2022.08.011>

© 2022 Biophysical Society.

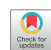

Among them, TMEM16F is one of the most well-characterized lipid scramblases, which, intriguingly, also functions as a largely non-selective ion channel (11,15,21,22). TMEM16F plays important roles in various physiological processes such as programmed cell death (23,24), blood coagulation (6,25), skeleton development (26), and cell fusion during entry of enveloped viruses such as HIV and Ebola (27,28). Loss-of-function mutations in TMEM16F cause Scott syndrome, a bleeding disorder associated with defective lipid scrambling in platelets (6,29,30).

Extensive studies have been conducted to investigate the structure and function of TMEM16F since its identification in 2010 (11). Functional studies have revealed structure elements that are important for TMEM16F functions, including the  $\text{Ca}^{2+}$ -binding site, pore-lining residues, and the dimerization interface (7,19). A key breakthrough was the recent determination of high-resolution structures of TMEM16 proteins, which provide a crucial structural basis for understanding their functions (31–37). Interestingly, these structures reveal that TMEM16 ion channels and lipid scramblases share a highly conserved structural organization. All TMEM16 proteins are double-barreled homodimers; each monomer contains 10 TM helices and harbors an independent membrane-facing conducting pore (Figs. 1 A and S1). These TM helices can be divided into two functional domains, including the pore-forming domain, TM3–8, and the dimerization and supporting domain, TM1, -2, -9, and -10. The pore-forming domain can be further divided into the regulatory (TM3–5) and  $\text{Ca}^{2+}$ -binding activation modules (TM6–8) (38–40). The molecular mechanisms of  $\text{Ca}^{2+}$  activation appear conserved in the TMEM16 family proteins (32–37). In the  $\text{Ca}^{2+}$ -free state, TM3–7, especially TM4 and -6, pack tightly and create a narrow vestibule that is impermeable to ions and lipids.  $\text{Ca}^{2+}$  binding mainly induces large conformational transitions in TM6, such as straightening and vertical displacement in *Aspergillus fumigatus* TMEM16 (afTMEM16) (36) and helix unbending and extension in mammalian TMEM16A (mTMEM16A) (31,35). Specifically for murine TMEM16F,

the TM6 helix is extended by two turns on the intracellular side (Fig. 1 B, green versus black cartoons), and the lower pore region can accommodate multiple lipid headgroups (Fig. 1 A, yellow arrow) (40). However, the narrowest point near the middle of the membrane-facing pore remains too constricted for either ions or lipid transduction (Fig. 1 A, red/blue arrows), indicative of a non-conductive conformational state. Instead, all available structures of  $\text{Ca}^{2+}$ -bound mTMEM16 proteins resemble an intermediate non-conductive state of  $\text{Ca}^{2+}$ -bound *Nectria haematococca* TMEM16 (nhTMEM16) (32).

At present, the open and conductive structures are only available for fungal scramblases nhTMEM16 and afTMEM16, two evolutionary remote homologs of mTMEM16F (34,36,41). In  $\text{Ca}^{2+}$ -bound structures of both scramblases, TM4 and -6 move away from each other, which leads to a wider and largely hydrophilic groove at the protein-membrane interface (e.g., see Fig. 1 B). This TM movement during activation has been referred to as a “clam-shell” model and proposed to be conserved in TMEM16 family proteins (38–40). Based on structural and mutagenesis studies, a “credit card” model has been proposed as the lipid transport mechanism in TMEM16 family scramblases (20,42). Here, the membrane-facing groove is wide and hydrophilic enough that it provides a favorable pathway for the lipid headgroups to diffuse across the membrane, while the lipid tails remain anchored in the hydrophobic region of the bilayer. The credit card model has been observed directly in molecular dynamics (MD) simulations of nhTMEM16 (43,44). In addition to interactions between hydrophilic pore-lining residues and lipid headgroups, TMEM16F also induces substantial deformation and thinning of the membrane to significantly reduce the free-energy barrier for lipid diffusion, decreasing the phospholipid flip flop time constant from  $\sim 1$  h (spontaneous flip flop) to  $\sim 2 \times 10^{-5}$  s per lipid (45,46). It has been further suggested that the membrane-facing hydrophilic groove could function as both lipid and ion transduction pathways in nhTMEM16 based on simulation as well as experiment

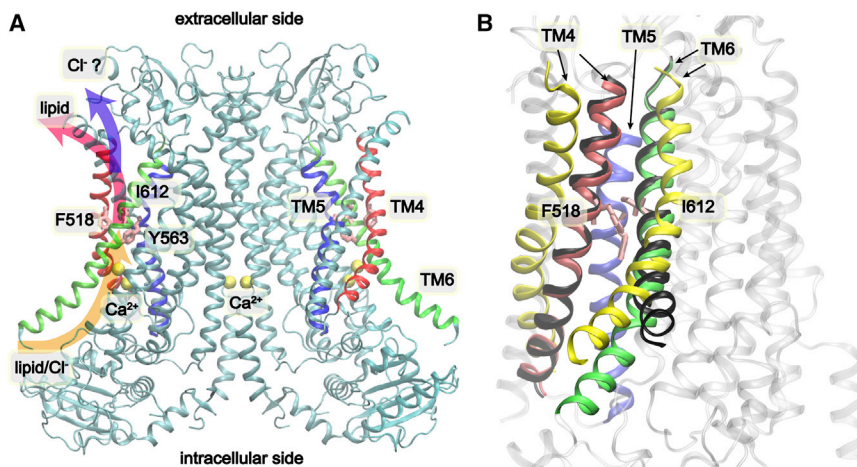

FIGURE 1 Overall structure of mTMEM16F. (A) Structure of  $\text{Ca}^{2+}$ -bound mTMEM16F (PDB: 6QP6 (32)), where the pore-forming TM4, -5, and -6 are colored in red, blue, and green, respectively. The proposed lipid and ion conduction pathways are highlighted with arrows. Bounded  $\text{Ca}^{2+}$  ions are presented as yellow spheres. (B) Superposition of TM4–6 of  $\text{Ca}^{2+}$ -bound mTMEM16F (colored in red, blue, and green, respectively),  $\text{Ca}^{2+}$ -free mTMEM16F (black), and open nhTMEM16 (yellow). The PDB IDs used are PDB: 6QP6, 6QPB (32), and 4WIS (34). All structures were aligned using the backbones of TM1–3 and TM7–10. To see this figure in color, go online.

(44). Interestingly, Malvezzi et al. found that aTMEM16 was able to translocate phospholipids with polyethylene glycol headgroups (47), which are likely too large to fit in the groove. These observations suggest the existence of an “out-of-the-groove” transportation mechanism, where aTMEM16 may deform and thin the membrane around the groove such that lipids can diffuse across the membrane without strictly via the hydrophilic groove (47). It has been further shown that membrane thickness and the ability of the protein to thin the membrane can determine the scrambling activities, with and without an open hydrophilic pathway (48). The implication is that an open membrane-facing groove may not be required for scramblase activities. Curiously, recent cryoelectron microscopy (cryo-EM) structures of caspase-activated scramblases Xkr8 (49) and Xkr9 (50) do not reveal an open hydrophilic pathway, and our atomistic simulations of Xkr8 do not show significant membrane thinning (unpublished data).

We previously combined experiment and atomistic simulation and identified three hydrophobic residues in the middle of the putative lipid permeation pathway of mTMEM16F, namely F518 (TM4), Y563 (TM5), and I612 (TM6), that act as an inner activation gate to control the lipid scrambling activity (40). Bulky mutations of these residues reduce the scramblase activity, whereas replacing the inner gate residues by either hydrophilic or charged amino acids leads to gain-of-function scramblases. In particular, lysine substitution of either F518 or Y563 leads to constitutively active scramblases even in the absence of  $\text{Ca}^{2+}$  (40). Homology modeling suggested that charged mutations likely destabilized the hydrophobic inner gate to promote activation (40). In addition, the effect may also be partially attributed to charge repulsion between the introduced positive charges on TM4/5 and conserved K616 on TM6. Notably, a lysine substitution in mTMEM16A L543 (corresponding to the F518 in mTMEM16F) confers novel  $\text{Ca}^{2+}$ -activated lipid scrambling activity to the CaCC (40), suggesting that the inner gate and activation mechanism may be conserved within mTMEM16 proteins. The discovery of these activation mutations provides an opportunity to leverage atomistic simulations to discover possible open state(s) and study the molecular basis of mTMEM16F activation and lipid and ion transport mechanisms.

In this work, we performed large-scale atomistic simulations of the inner gate charged mutants of mTMEM16F to study the activation mechanism and conducting properties. The results show that both constitutively active mutants (F518K and Y563K) lead to open and conductive states that resemble those of nhTMEM16. Free-energy analysis suggests that the open state of the groove is a meta-stable state even for the wild-type (WT) mTMEM16F in the  $\text{Ca}^{2+}$ -bound state. We further analyzed the activation transition and structural properties of the activated state, as well as lipid and ion permeation pathways of mTMEM16F.

## MATERIALS AND METHODS

### Atomistic simulations

The cryo-EM structures of mouse TMEM16F in the  $\text{Ca}^{2+}$ -bound (PDB: 6QP6) were used in all simulations reported in this work. The missing short loops in the cytosolic domain (I197-N227 and N428-Q437) were rebuilt using the ProMod3 tool with Swiss-PDB server (51). The missing N- and C-terminal segments as well as a long loop in the cytosolic domain (P150-P186) are presumably dynamic and thus not included in current simulations. Residues before and after the missing segments are capped with either an acetyl group (for N-terminus) or an N-methyl amide (for C-terminus). To minimize the effects of missing loop residues on the cytosolic domain, the backbones of the structured region of the cytosolic domain (D72-E78, T90-R116, L123-H129, W132-L148, F187-R191, P206-V220, K243-P247, L874-T875) were harmonically restrained with a force constant of  $1.0 \text{ kcal}/(\text{mol} \times \text{Å}^2)$  during all simulations.

As summarized in Table S1, 6 sets of atomistic simulations were performed. The first four sets involved the mTMEM16F WT, F518K, Y563K, and F518K/Y563K mutants. The initial structure of  $\text{Ca}^{2+}$ -bound mTMEM16F was taken from PDB: 6QP6 (32). All initial mTMEM16F structures were first inserted in model lipid bilayers and then solvated with TIP3P water using the CHARMM-GUI web server (52). The cytoplasmic leaflet contains a ratio of 1:1 for palmitoyl-oleoyl phosphatidylserine (POPS):phosphatidylethanolamine (POPE) and the exoplasmic leaflet contains 100% phosphatidylcholine (POPC). All systems were neutralized, and 150 mM KCl was added. The final simulation boxes contain about 795 lipid molecules, with a total of  $\sim 316,000$  atoms and dimensions of  $\sim 165 \times 165 \times 135 \text{ Å}^3$ . The CHARMM36m all-atom force field (53) and the CHARMM36 lipid force field (54) were used. All simulations were performed using CUDA-enabled versions of Gromacs 2019.4 (55,56). Electrostatic interactions were described by using the particle mesh Ewald algorithm (57) with a cutoff of  $12 \text{ Å}$ . The cutoff of van der Waals interactions was set at  $12 \text{ Å}$  with a smooth switching function starting at  $10 \text{ Å}$ . Covalent bonds to hydrogen atoms were constrained by the SHAKE algorithm (58), and the MD time step was set at 2 fs. The temperature was maintained at 298 K using the Nose-Hoover thermostat (59,60). The pressure was maintained semi-isotropically at 1 bar at membrane lateral directions using the Parrinello-Rahman barostat algorithm (61).

All systems were first minimized for 5,000 steps using the steepest descent algorithm, followed by a series of equilibration steps where the positions of heavy atoms of the protein/lipid were harmonically restrained with force constants gradually decreased from 10 to  $0.1 \text{ kcal}/(\text{mol} \times \text{Å}^2)$  (52). In the last equilibration step, only protein heavy atoms were harmonically restrained with a force constant of  $0.1 \text{ kcal}/(\text{mol} \times \text{Å}^2)$ , and the system was equilibrated 10 ns under constant particle number, pressure, and temperature conditions. All production simulations were performed under constant particle number, pressure, and temperature conditions at 298 K and 1 bar.

### Umbrella sampling free-energy calculations

Umbrella sampling simulations (62) were used to calculate the potentials of mean force (PMFs) of opening transitions. The distance between C $\alpha$  atoms of inner gate residues F/K518 and I612 reaction coordinate was chosen as the order parameter. Umbrella sampling windows were placed at  $1 \text{ Å}$  intervals and covered 5.5 to  $16.5 \text{ Å}$ . For the F518K/Y563K mutant, the initial structures of each window were taken from *sim 10*. The same set of initial structures was used for umbrella sampling of the WT channel, except that reverse mutation and additional equilibration steps were performed before sampling. Specifically, systems were first minimized for 5,000 steps using the steepest descent algorithm, followed by six equilibration processes (with 2,500 steps for each equilibration process) where the positions of heavy atoms of the protein/lipid were harmonically restrained with force constants gradually decreased from 10 to  $0.1 \text{ kcal}/(\text{mol} \times \text{Å}^2)$ . Two monomers within the dimer were restrained and sampled independently in each window, and the data were combined in subsequent analysis. The force

constant of the harmonic umbrella potentials was  $0.24 \text{ kcal}/(\text{mol} \times \text{\AA}^2)$ , and the sampling time for each window was 40 ns. The final PMFs were calculated using the weighted histogram analysis method (63). Note that two PMFs were calculated for two pores within the dimer, respectively, from each set of umbrella sampling. Two sets of umbrella sampling were performed, with independently selected initial structures, to better evaluate convergence. The final free-energy profile was the average of the four individual ones (2 monomer  $\times$  2 umbrella sampling), and the error bars were estimated as the standard deviation among individual profiles.

## Meta-dynamics simulation of ion permeation pathways

Well-tempered meta-dynamics simulations (64) were used to generate many ion permeation events through the pore to explore possible ion permeation pathways of the WT mTMEM16F protein. To generate an open structure of WT TMEM16F, reverse mutation was performed on a representative fully open snapshot from simulations of the mTMEM16F F518K/Y563K mutant (Table S1, *sim 10*). Subsequent simulations (Table S1, *sims 13–15*) demonstrated that the open state of WT mTMEM16F was stable (Fig. S2, *right row*). The initial structure for meta-dynamics was taken from *sim 13*. Meta-dynamics simulations were performed using plumed 2.5.3 plugin (65) (Table S1, *meta 1 and 2*). Systems were first minimized for 5,000 steps using the steepest descent algorithm, followed by six equilibration processes (with 2,500 steps for each equilibration process) where the positions of heavy atoms of the protein/lipid were harmonically restrained with force constants gradually decreased from 10 to  $0.1 \text{ kcal}/(\text{mol} \times \text{\AA}^2)$ . The backbones of the structured region of the cytosolic domain were harmonically restrained with a force constant of  $1.0 \text{ kcal}/(\text{mol} \times \text{\AA}^2)$ . A single  $\text{Cl}^-$  ion inside the intracellular vestibule was randomly selected, and its  $z$  coordinate was used as the collective variable in meta-dynamics simulations. The height of the Gaussians was set to  $0.01 \text{ kcal}/\text{mol}$  with a deposition time  $\tau$  of 2 ps and a bias factor of 15. Note that two  $\text{Cl}^-$  ions were subjected to independent meta-dynamics sampling in each run, one in each of the two pores within the dimer. To prevent the selected  $\text{Cl}^-$  ions from escaping the pore region, a flat-bottom harmonic potential was imposed between the intracellular and extracellular boundaries with a force constant of  $10 \text{ kcal}/(\text{mol} \times \text{\AA}^2)$ , such that multiple reversible permeation events could be generated for each ion. A permeation event is identified whenever the ion diffuses from one of the two boundaries and reaches the other. The length of each meta-dynamics simulations was 400 ns, which was enough to generate  $\sim 10$  permeation events.

## Analysis

Unless stated otherwise, snapshots were extracted every 50 ps after 200 ns of all equilibrium MD trajectories for analysis. For lipid contact probability calculation, we used the stable state of trajectories from both WT and mutants, i.e.,  $0.5\text{--}1 \mu\text{s}$  in WT simulations and  $2.5\text{--}4 \mu\text{s}$  in mutant simulations. To calculate the phospholipid head contact probability, a protein residue is considered in contact with the lipid headgroup if the minimal heavy atom distance is no larger than the standard cutoff of  $4.2 \text{\AA}$ . Molecular illustrations were prepared using VMD (66). Pore profiles were calculated using program HOLE (67). The helix tilt angle is defined as the angle between the helical principal axis and the  $z$  axis (membrane normal).

## RESULTS

### Inner gate charged mutations can induce spontaneous mTMEM16F pore opening

Sets of three multi- $\mu\text{s}$  atomistic simulations were performed for mTMEM16F inner gate charged mutants, F518K and

Y563K, together with the WT protein to evaluate if these charged mutations would promote pore-opening transitions (Table S1). We first examined the distance between C $\alpha$  atoms of inner gate residues 518 (F/K, TM4) and I612 (TM6), which reflects the level of pore opening at the most constricted inner gate region during the simulations. Of note, the two membrane-facing pores within the same dimer act independently. As summarized in Figs. 2 A and S2, both F518K and Y563K single mutations consistently promoted the pore dilation, widening the TM4-TM6 separation from  $\sim 5$  to over  $10 \text{\AA}$  in 6 out of 12 pores within the two sets of 3 independent simulations (*sims 4–6* and *7–9*). In contrast, no spontaneous pore opening was observed in the three parallel WT simulations of the same simulation length ( $3 \mu\text{s}$ ) (Figs. 2 A and S2, *sims 1–3*). This observation suggests that a single charged mutation, either F518K or Y563K, is indeed able to induce spontaneous inner gate opening, consistent with experimental observations that F518K and Y563K mutants are constitutively active under physiological conditions. Nonetheless, there is substantial heterogeneity in the opening transitions sampled in these simulations. The dilated states of the pore remain dynamic in all cases, as reflected by the substantial fluctuation in the inner gate residue 518-612 separation distance (Figs. 2 and S2). It is also clear that the more widely open states (with  $\sim 14 \text{\AA}$  separation, e.g., *red arrow* in Fig. 2 A) were only transiently sampled with a single charged mutation within the current simulation timescale.

To better sample the fully open state and facilitate its characterization, we performed additional simulations with double charged mutations, F518K/Y563K (Table S1, *sims 10–12*), which should enhance the repulsive electrostatic force to promote more rapid opening transitions and further stabilize the fully open state. Indeed, during F518K/Y563K mutant simulations, spontaneous pore opening occurred more readily as the inner gate residue 518-612 distance increased rapidly from  $\sim 5$  to  $\sim 15 \text{\AA}$  within  $0.5 \mu\text{s}$  and remained around  $14 \text{\AA}$  in all three independent simulations (Figs. 2 A and S2, *sims 10–12*; Video S1). It should also be noted that despite a slight increasing of pore dilation, the open state from the double charged mutant is similar to the most widely open states of the two single charged TMEM16F mutants (Fig. S3). Two representative conformations were extracted from the simulation trajectories to illustrate the structural differences between the closed and open states of the pore (Fig. 2 A and C). Clearly, inner gate charged mutations lead to an expansion of the entire membrane-facing pore (Fig. 2 D). In particular, expansion of the upper pore region exposes the hydrophilic groove formed by TM3–6, which connects to the lower pore region through the disengaged inner gate region to provide a continuous and largely hydrophilic membrane-facing groove (Fig. 2 C, *green mesh*). The dilation of the pore is accompanied by a significant increase in pore hydration (and lipid headgroup occupancy; see below), especially in the

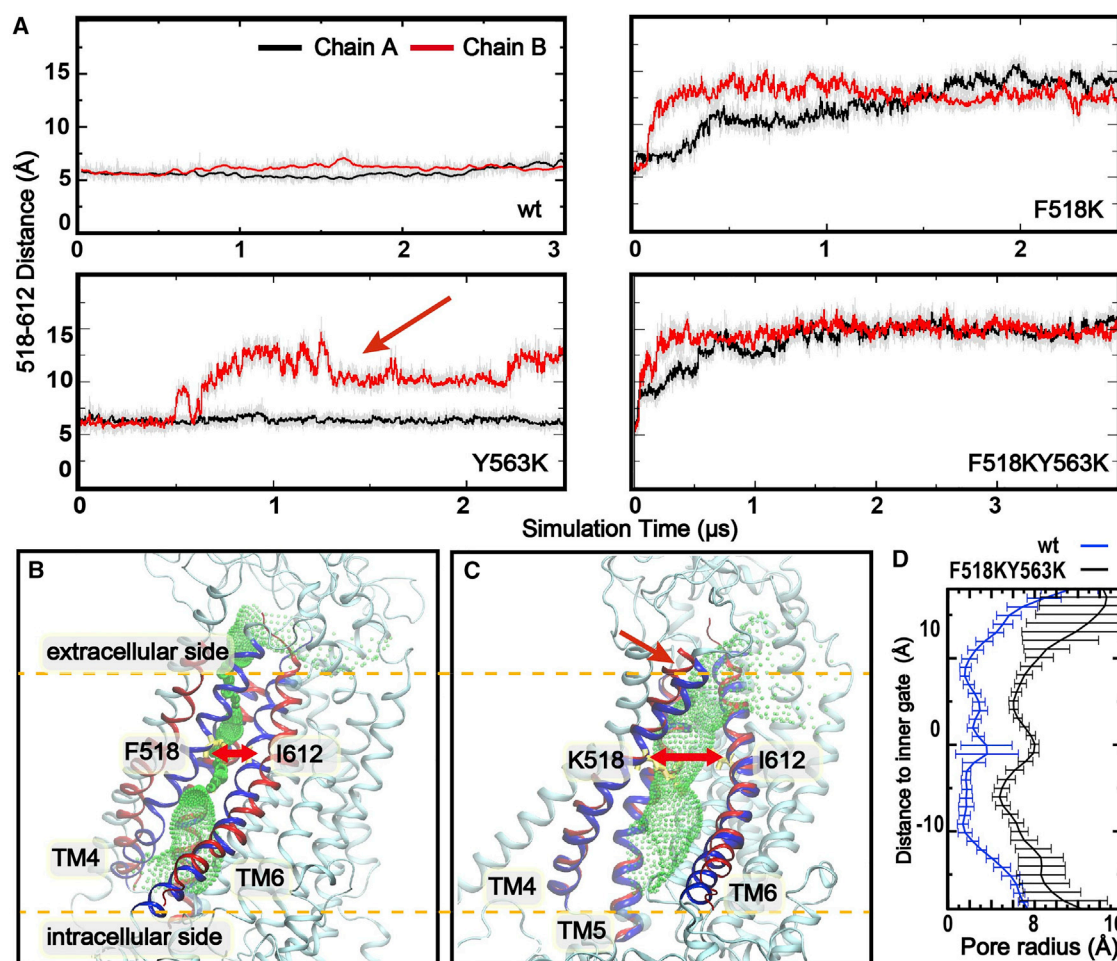

FIGURE 2 Spontaneous mTMEM16F pore opening induced by inner gate charged mutations. (A) Distance between the C $\alpha$  atoms of inner gate residues 518 and 612 as a function of the simulation time (Table S1, *sims 1, 4, 7, and 10*). The red arrow highlights a region where the 518-612 distance shows substantial fluctuations. All traces plot 2.5 ns (50 frame) running averages for clarity, and the raw data (recorded every 50 ps) are represented as gray lines. (B and C) Representative structures of the closed (*sim 1*, chain A at 1  $\mu$ s) and open (*sim 4*, chain A at 4  $\mu$ s) pore conformations of mTMEM16F. TM4, -5, and -6 are colored in blue, while those of the open state of nhTMEM16 are shown as a red cartoon as a reference. The pore profiles calculated by the HOLE program (67) are illustrated as green dots. (D) Average pore radius profiles calculated by HOLE for the WT (blue trace) and F518K/Y563K mutant (black trace). The averages were calculated from the last 100 ns of WT and F518K/Y563K mutant simulations (*sims 1 and 10*) with one snapshot every 1 ns, and the error bars plot the standard deviations within the 100 snapshots. To see this figure in color, go online.

narrower upper pore region. As shown in Fig. 3, the number of water molecules within 6 Å radius around the pore-centering residue S566 increased from  $\sim 5$  to  $\sim 20$ . Together with the physical expansion, the open pore seems ready to support the permeation of the large lipid headgroups across the membrane core. For example, lipid headgroups can readily penetrate into the inner pore region (Fig. 3 D).

### Open conformation and activation mechanism of TMEM16 scramblases are likely conserved

As shown in Fig. 2 C, the open state of the pore identified in our simulations of mTMEM16F double charged mutants (blue cartoon) is highly similar to the known activated state of nhTMEM16 (red cartoon) (34). During the simulations, the backbone root-mean-squared distance of TM4–6 regions

between the mTMEM16F F518K/Y563K mutant and nhTMEM16 decreased from  $\sim 4.5$  to  $\sim 2$  Å as the pore undergoes opening transitions, while the root-mean-square distance remains stable above 4 Å in all three simulations of WT mTMEM16F (Fig. 4). The most notable difference between the open states of mTMEM16F and nhTMEM16 is at the upper pore region of TM4 (M507-F518) (Fig. 2 C, red arrow), likely due to two additional proline (P332 and P341) in the nhTMEM16 sequence. Nonetheless, the overwhelming similarity of the open conformations strongly suggest that the activation and ion and lipid permeation mechanisms are likely conserved among various TMEM16 scramblases.

To further analyze the predicted activation transition, we calculated the distributions of centers of mass (COMs) of all 10 TMs in the closed and open states. As shown in Fig. 5,

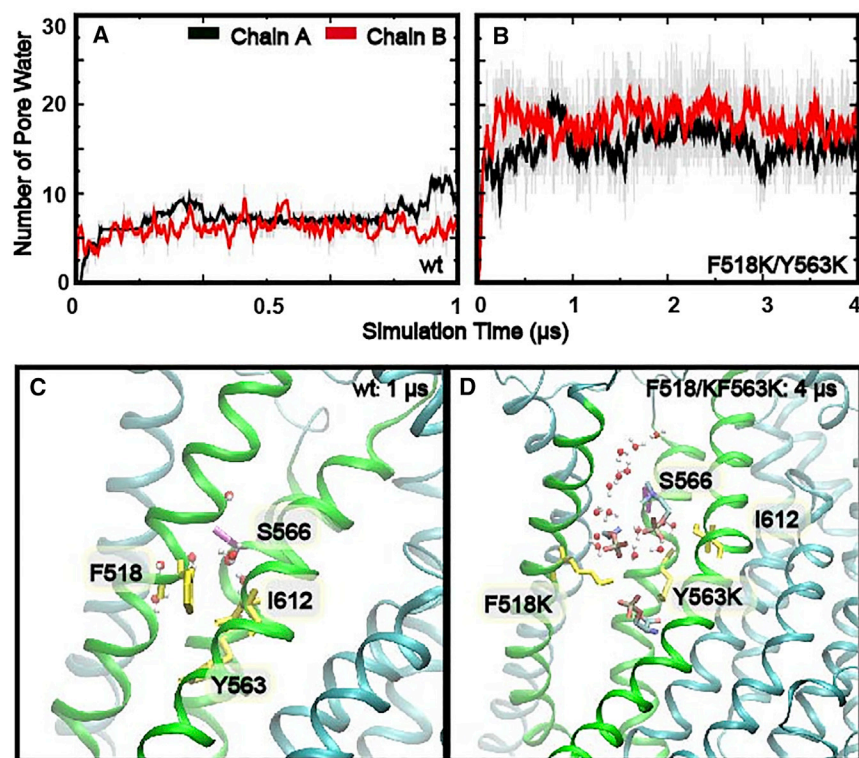

FIGURE 3 Hydration of the upper pore region. (A and B) Number of water molecules within 6 Å around S566 located at the center of the upper pore region (see C and D) as a function of simulation time. The water counts for chains A and B are shown using black and red lines, respectively. All traces plot 10 ns (10 frame) running averages for clarity, and the raw data (hydration property analyzed every 1 ns) are represented as gray lines. (C and D) Representative snapshots showing the hydration of the upper pore region in the closed and open states (WT: *sim 1* chain A at 1  $\mu$ s; F518K/Y563K: *sim 10* chain A at 1  $\mu$ s). Water molecules are represented as sticks and balls. Lipid headgroups are shown as sticks. TM4, -5, and -6 are colored in green, while the other TMs are colored in cyan. To see this figure in color, go online.

the activation mainly involves movements of TM3, -4, and -6, while the rest show minimal movements. Specifically, COMs of both TM3 and -6 shift  $\sim 2$  Å away from each other. TM4 shows the largest movement, shifting  $\sim 4$  Å outward and away from the rest of TMs (Fig. 5 A). Importantly, TM helices maintained their origin orientations during activation, and changes in the tilting angles before and after activation were within  $2^\circ$  for all the TMs (Table S2). These movements not only lead to larger separation between TM4 and -6 and thus dilation of the pore but also slightly increase the separation of TM3 and -4. Though no inner gate residues reside on TM3, its movement is apparently required for TM4 movement and thus mTMEM16F activation. We

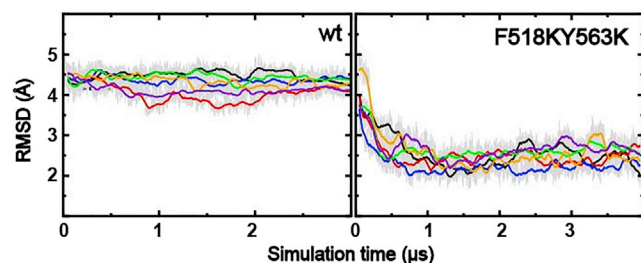

FIGURE 4 Backbone root-mean-squared distance of TM4-6 with respect to hTMEM16 as a function of simulation time. The results were calculated for each monomer from simulations 1-3 and 10-12 (see Table S1) (6 independent traces). All traces plot 10 ns (10 frame) running averages for clarity, and the raw data (analyzed every 1 ns) are represented as gray lines. To see this figure in color, go online.

note that TM3 is part of a specific phosphatidylinositol-(4,5)-bisphosphate (PIP<sub>2</sub>) binding site near the cytosolic membrane interface that was previously shown to play a key role in allosteric regulation of TMEM16A CaCCs (39). It is known that PIP<sub>2</sub> also regulates TMEM16F channel activities (68,69). Notably, TM3 is the only helix that displayed substantial heterogeneity in our simulations (Fig. 4 A) and appears to sample multiple conformations in the activated state of mTMEM16F. Such elevated dynamics could be consistent with a potential role of TM3 in allosteric regulation of mTMEM16F activation by PIP<sub>2</sub> or other cofactors.

To evaluate if the predicted open state is accessible for the WT protein, we calculated the free-energy profiles of the open-close transition of the pore in the Ca<sup>2+</sup>-bound state, using the distance between C $\alpha$  atoms of inner gate residue F518 and I612 as the order parameter. The results show that the open state ( $\sim 15$  Å; Fig. 6, black trace) is  $\sim 1.5$  kcal less stable than the closed state ( $\sim 5.5$  Å) in the WT protein, suggesting an open-state population of only  $\sim 8\%$  at room temperature. Introduction of charges at the inner gate in the F518K/Y563K mutant significantly stabilizes the open state, which is now  $\sim -5$  kcal/mol more stable than the closed state, increasing the open-state population to over 99.9%. We caution that accurate calculation of free-energy profiles of large-scale conformational transitions of a large and complex protein like mTMEM16F is extremely challenging. Large uncertainties persist even with an aggregated 160 ns sampling per umbrella sampling window, reflected in

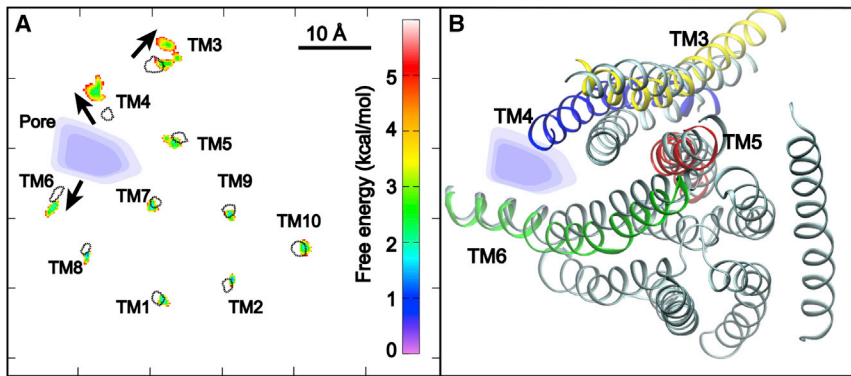

**FIGURE 5** TM movements of mTMEM16F activation induced by F518K/Y563K inner gate mutations. (A) Distributions of centers of mass of all 10 TMs along membrane lateral directions ( $x, y$ ) in the closed and activated states. The distributions for the activated state (*sims 10–12*, 1–2.5  $\mu$ s) are plotted as colored free-energy maps (in kcal/mol), while those for the closed state (*sims 1–3*, 2.5–3  $\mu$ s) are shown as dashed contours (at level: 5 kcal/mol). The approximate pore location is also indicated by blue shadows. The arrows highlight three TMs with the largest movements. (B) Representative snapshots showing the orientation of pore-forming TMs in the closed (*sim 1*, 1  $\mu$ s, gray cartons) and open states (*sim 10*, 4  $\mu$ s). TM3–6 are colored in yellow, blue, red, and green, respectively, in the open state. To see this figure in color, go online.

substantial error bars in Fig. 6. Nonetheless, the free-energy profiles further confirm that the open states of the pore are likely similar between the WT and mutant channels, both having a characteristic separation between inner gate residues F/K518 and I612 at  $\sim 15$  Å. That is, the inner gate charged mutations likely increase the stability of the open state without significantly perturbing its conformational properties.

It is curious that existing structures show that the pore of mTMEM16F remains closed even in the presence of  $\text{Ca}^{2+}$  and other activators such as  $\text{PIP}_2$  (33). This may be due to the open state of mTMEM16F being less stable than the closed state and the pore only opening transiently. A relatively low population of the open state ( $\sim 8\%$ ), coupled with the apparent dynamic nature of the open state (reflected as the broad meta-stable open state basin; Fig. 6), could explain why cryo-EM structural studies have failed to

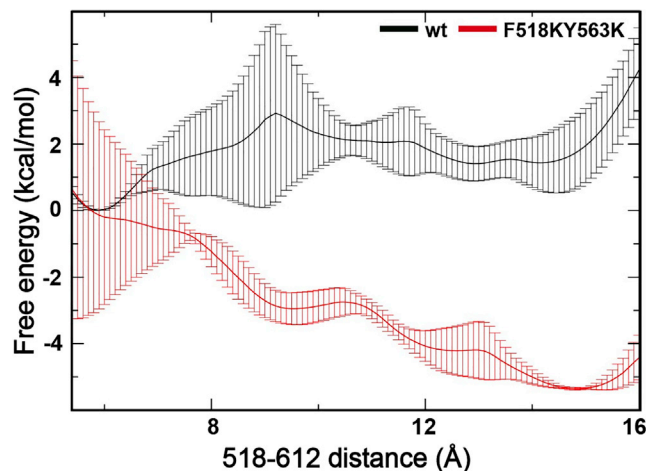

**FIGURE 6** Averaged free-energy profiles of pore opening of WT and F518K/Y563K mutant mTMEM16F. The distance between  $\text{C}\alpha$  atoms of inner gate residues F/K518 and I612 is chosen as the order parameter. The profiles were calculated using umbrella sampling (see materials and methods), and individual profiles from both monomers from two independent umbrella sampling calculations are shown in Fig. S4. To see this figure in color, go online.

resolve the open state. We further tested if the WT channel would undergo spontaneous closure when initiated from reverse mutation of the fully open conformation of the double charge mutant (Table S1, *sims 13–15*). The results suggest that the open state persists after 1  $\mu$ s simulations (Fig. S2), suggesting it is at least a meta-stable state. We note that spontaneous closure of the pore will likely be very slow and beyond the  $\mu$ s timescale due to the need for expelling the lipid headgroups from the dilated groove. For example, we only observed a single lipid diffusion event out of  $\sim 30$   $\mu$ s of simulations (Table S1, *sims 4–12*), which lasted essentially the full 4  $\mu$ s (see below).

### Pathway and mechanism of lipid translocation

The predicted open state of mTMEM16F is apparently conductive to phospholipids. As shown in Fig. S5, the dilated pore is fully accessible to the headgroup, and mTMEM16F induces substantial membrane thinning near the pore region as also observed previously (43). Interestingly, a full translocation of a POPE molecule from the inner leaflet to the extracellular side was observed during the simulation of mTMEM16F F518K/Y563K mutant (*sim 12*) (Video S2). In Fig. 7, the  $z$ -position of the COM of the POPE headgroup is depicted to visualize how the phospholipid headgroup migrated across the membrane, together with the lipid orientation and headgroup-contacting residues. Consistent with the pore profile shown in Fig. 2 D, the main bottleneck for lipid permeation is around the inner gate, where the dilated pore is the narrowest. The permeating headgroup remained in this region for over 2  $\mu$ s before it eventually managed to flip the orientation and rapidly diffused toward the extracellular side around 2.8  $\mu$ s. Such an extended plateau was probably also required to allow the hydrophobic alkyl tails to diffuse from the lower to upper leaflet within the hydrophobic membrane interior. The observation here is fully consistent with the credit card model, as also observed in previous studies of the nhTMEM16 scramblase (43,44). It is worth noting that the open state in both mutated and WT channels (*sims 10–12*

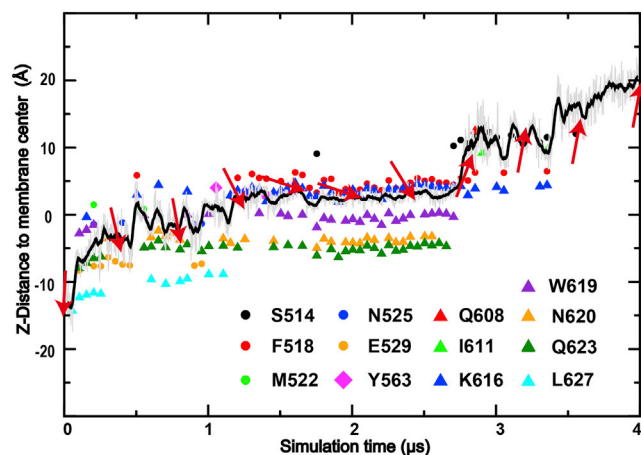

FIGURE 7 A spontaneous phospholipid translocation event observed in the simulation of mTMEM16F F518K/Y563K mutant. The z-distance of the lipid headgroup center of mass to the membrane center is shown as the black line as a function of simulation time. The z-position was analyzed every 1 ns (gray trace), and 20 ns running average is plotted. The phospholipid orientations at various time points are illustrated as red arrows, with the headgroup being the arrow head and the tail as the arrow tail. The lipid headgroup contacting residues along the trajectory are shown by different colors and shapes drawn at corresponding z-positions. To see this figure in color, go online.

and 13–15) led to significant disruption of lipid tails. The resulting mixing of lipid tails from upper and lower leaflets should facilitate lipid scrambling, similar to what was observed in a previous simulation of nhTMEM16 (70). However, in nhTMEM16, lipid tails have been observed to penetrate into the extracellular side of the translocation groove, whereas only headgroups were observed in this region in the current simulations of mTMEM16F, apparently due to the hydrophilic nature of the extracellular groove.

To further characterize the lipid transduction pathway and scrambling mechanism, we analyzed pore-lining residues that form close contacts with phospholipid headgroups in both the closed and open states of mTMEM16F by calculating contact probabilities from all trajectories (see [materials and methods](#)). An increased contact probability for a given phospholipid contacting site may indicate its role as a potential anchoring point or a waystation for phospholipid translocation. Fig. 8 A summarizes all 12 pore-lining residues, namely V453, R478, S510, S514, K518, I521, S566, L603, E604, T607, Q608, and I611, whose phospholipid head contact probabilities are  $>0.3$  and at least three times larger in F518K/Y563K mutant simulations than in WT simulations. It is worth noting that 9 out of these 12 residues are charged and polar ones and that all but one (V453) locate in the upper pore region above the inner gate (Fig. 8 B). Therefore, a major consequence of the pore dilation (as induced by inner gate charged mutations here) is the exposure of the upper pore hydrophilic patches, which increases the pore hydration level (Fig. 3) and, importantly, provides favorable interactions with lipid headgroups to lower the

free-energy barrier for lipid transduction. Note that even though the lower pore region also undergoes substantial expansion during activation (Fig. 2), it is well accessible to phospholipid headgroups even before full activation, which was also observed in our previous simulations (40).

### Ion and lipid transduction pathways only partially overlap

As discussed above, an intriguing property of mTMEM16F is that it can moonlight as a non-selective CaCC (11,21,22,71). An important question is whether ions and lipids share the same pathway through mTMEM16F. As shown in Fig. 2 D, the minimal average pore radius of the WT mTMEM16F along the pore is nearly  $<2$  Å, too narrow to accommodate hydrated ions (which require a pore radius  $>5$  Å). The ion impermeability of the WT protein is also consistent with a recent simulation study showing that the pore region remained dehydrated and occluded to ions (72). The open state of the pore, however, has a minimum radius of  $\sim 6$  Å and is well hydrated (Fig. 3), clearly capable of supporting the passage of fully hydrated ions. The large opening of the activated mTMEM16F pore is also apparently consistent with the non-selective nature of its channel function.

To further probe ion permeation pathway of the WT channel and its relationship with phospholipid translocation, we performed meta-dynamics simulations of the WT protein in the activated state (Table S1, *meta 1 and 2*). The conformation of activated WT mTMEM16F was generated using reverse mutation from the open state derived from simulations of the mTMEM16F F518K/Y563K mutant (see [materials and methods](#)). During meta-dynamics simulations, bias potentials were only accumulated along the z axis. The selected  $\text{Cl}^-$  ion was allowed to freely explore the membrane lateral directions and follow various possible pathways across the membrane (see [materials and methods](#)). A total 19 independent  $\text{Cl}^-$  passing events were observed during the two meta-dynamics runs, including 9 permeation events from the extracellular side to the intracellular side and 10 events in the opposite direction (e.g., see Video S3). As summarized in Fig. 9,  $\text{Cl}^-$  permeation pathways that are highly consistent with the pore profile were predicted by HOLE (Fig. 2). In addition, comparison of the distribution of  $\text{Cl}^-$  with the lipid headgroup density map (Fig. 9, orange mesh) suggests that the ion and lipid headgroup permeation pathways overlap on the intracellular side and both go through the dilated inner gate region but diverge in the upper pore region on the extracellular side (Fig. 9 A and B). Specifically, while the lipid headgroups apparently exit toward membrane above the inner gate, as expected in the credit card model, ions exit through the extracellular vestibule walled by TM4–6 (the region with blue spheres but no orange meshes in Fig. 9 A and B). A closer inspection revealed several polar and charged residues, including S593,



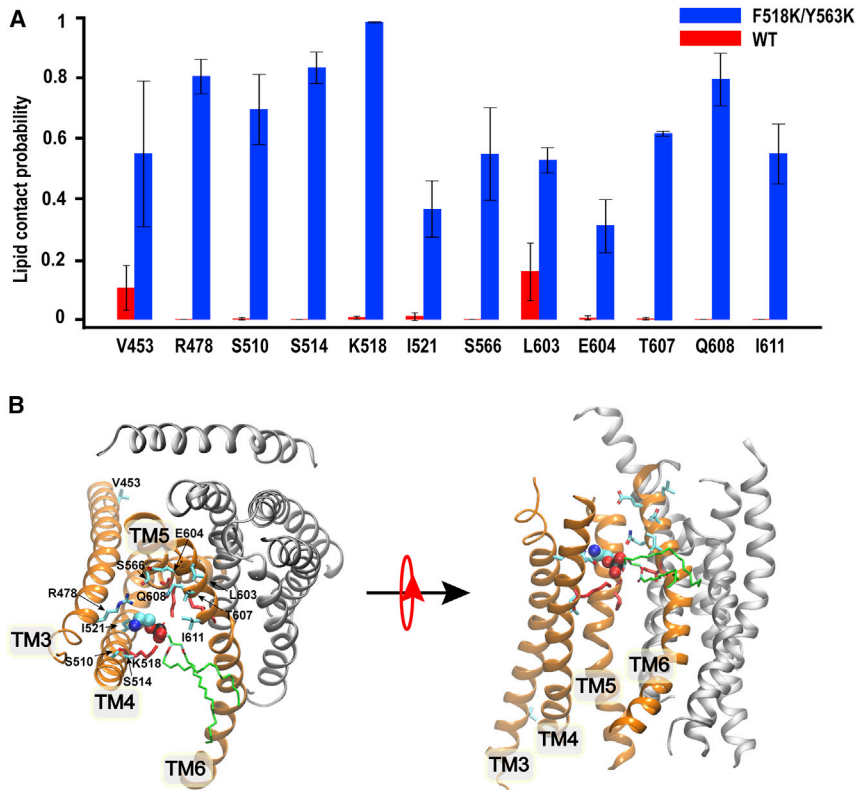

**FIGURE 8** Lipid headgroup contact probabilities of pore-lining residues. *(A)* Lipid headgroup contact probabilities of key residues, selected as those with probability  $>0.3$  and increased at least 3-fold in the activated state. Error bars show the standard deviations among independent simulations. *(B)* The top and side views of a monomer of mTMEM16F scramblase with a POPE interacting with upper pore region (*sim 12*). The lipid headgroups are presented as green spheres and the tails as green sticks. Key headgroup contacting residues (see *A*) and the lipid headgroup are shown with C, N, O, and P atoms colored in cyan, blue, red, and black, respectively. The lipid tail is shown by green sticks. The inner gate residues are shown in red sticks. To see this figure in color, go online.

E594, E595, D597, and K574, in the extracellular vestibule that provide a highly hydrophilic and well-hydrated environment, allowing it to effectively serve as a hub for  $\text{Cl}^-$  before it enters the inner gate or exits to bulk solvent region (Fig. 9 C). We further note that this ion permeation pathway is highly similar to the one observed for mTMEM16A CaCCs when activated by both  $\text{Ca}^{2+}$  and  $\text{PIP}_2$  binding (39).

## DISCUSSIONS

Recent structural studies of mTMEM16F have provided a crucial basis for understanding its dual functionality as both scramblases and ion channels and revealed key features of  $\text{Ca}^{2+}$ -dependent activation (31–37). Yet, these structures do not include an open and conductive conformation, preventing one from a deeper understanding of the molecular mechanisms of mTMEM16F activation and ions and lipids transduction. Leveraging the previous discovery of constitutively active inner gate charged mutations, namely F518K and Y563K, we performed multi- $\mu\text{s}$  atomistic simulations and were able to reproducibly observe spontaneous pore-opening transitions of mTMEM16F, providing key new insights into its possible activation. Free-energy analysis suggests that charge mutations mainly stabilize the open state, but do not appear to significantly affect the degree of pore opening, as measured by the distance between C $\alpha$  atoms of inner gate residues F/K518 and I612 (Fig. 6).

The predicted open state is only a meta-stable state for WT mTMEM16F, with an estimated occupancy of  $\sim 8\%$ . The low occupancy together with the dynamic nature of the open state could explain why existing structural studies failed to resolve an open state of mTMEM16F even in the  $\text{Ca}^{2+}$ -bound state.

During the opening transition, TM4 and -6 moved away from one another, increasing the minimal pore radius to  $\sim 6$  Å. Importantly, the fully dilated pore of mTMEM16F predicted by the simulations resembles the open state of the fungi homologs nhTMEM16, suggesting that the activation mechanism is likely conserved among TMEM16 family proteins. While mTMEM16F activation mainly involves TM4 and -6 movements, our simulations also reveal a significant shift of TM3 to accommodate the pore opening. Importantly, TM3 remains dynamic in the activate state. Our previous studies of TMEM16A have revealed that binding of  $\text{PIP}_2$  to the cytosolic side of TM3–5 allosterically regulates the pore open-close equilibrium in CaCC channel run down (38). Atomistic simulations further revealed that  $\text{PIP}_2$  binding induces movement of both TM3 and -4 and leads to a similar pore-opening process as observed here (39). The dynamics of TM3 in the activated state of mTMEM16F therefore suggest that TM3 may also be involved in allosteric regulation of TMEM16F.

The predicted open state of mTMEM16F pore is well hydrated and capable of supporting both ion and lipid

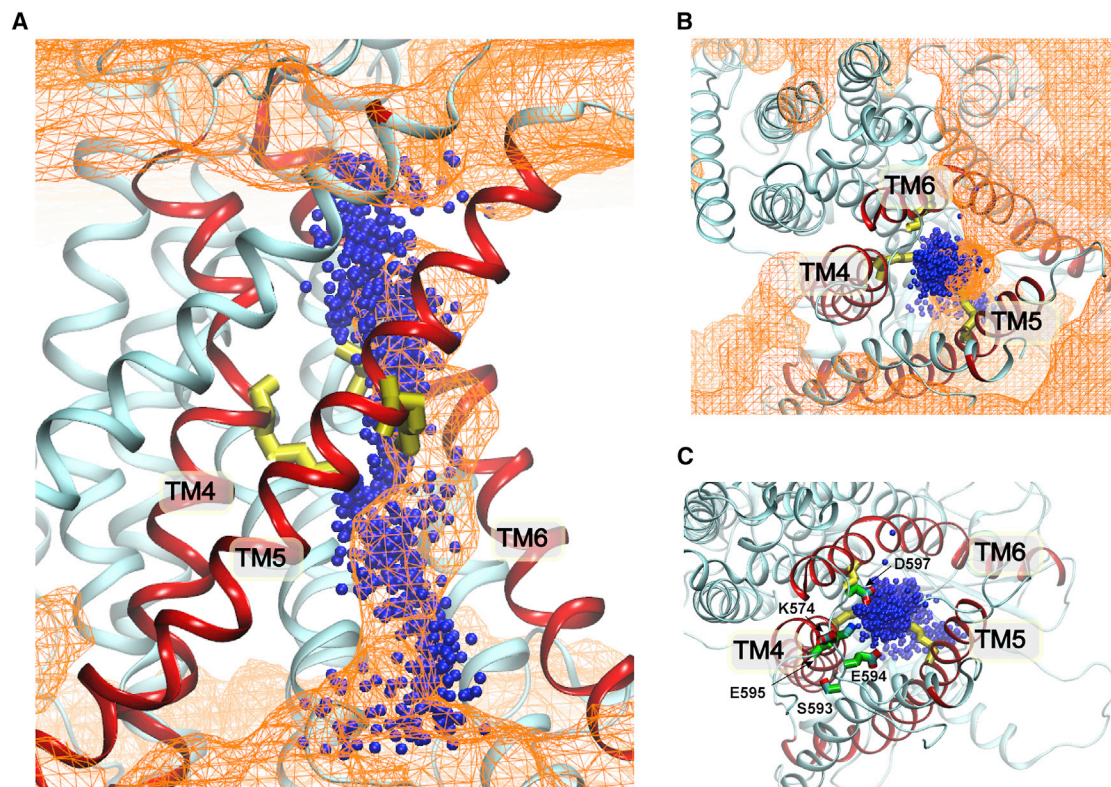

FIGURE 9 Phospholipid and ion permeation pathways of mTMEM16F. (A and B) The side (A) and top (B) views of ion positions (*blue beads*) as they permeated through the open pore from all 19 transition events sampled by meta-dynamics simulations (Table S1, *sim meta 1 and 2*). The orange mesh plots the density of the phosphate group derived from simulations of F518K/Y563K mutant scramblase with an isovalue of 0.001 atom/Å<sup>3</sup>. Inner gate residues are shown as yellow sticks. (C) Several polar and charged residues (S593, E594, E595, D597, and K574) in the outlet of ion permeation pathway (shown as *sticks* with C, O, and N colored in *green, red, and blue*). To see this figure in color, go online.

transduction. Analysis of lipid headgroup contacting probabilities of pore-lining residues revealed that dilation of the pore mainly increased the accessibility of upper pore hydrophilic patches to facilitate lipid translocation, supporting the credit card model (20,42). This mechanism is confirmed by a spontaneous lipid translocation event observed during one of the simulations (*sim 12*). We note that only small headgroup lipids (POPC, POPS, and POPE) were used in the current study, and the current study does not exclude the out-of-groove model. Additional simulations will be necessary to evaluate if lipids with larger headgroups may follow the out-of-groove pathways (47). Nonetheless, given the low occupancy (~8%) of the predicted open state for WT TMEM16F in the Ca<sup>2+</sup>-bound state, the physiological importance and relevance of the predicted in-groove pathway need to be further evaluated, especially considering structural and functional evidence supporting a critical role of membrane thinning in TMEM16 scramblases (48). It is possible that both in-groove and out-of-groove mechanisms co-exist and complement one and another. For example, Feng et al. suggested that the large distortion of membrane could allow lipid to bypass a closed pore and directly migrate from one leaflet to another near the protein surface (33). Interestingly, some residues found important in the out-of-

groove model are also involved in the credit card model, e.g., E604 and R478 (33). Falzone et al. showed that increasing membrane thickness could inhibit scrambling despite an open membrane-facing hydrophilic pathway in afTMEM16 (48). On the other hand, discoveries of small-molecule blockers of lipid transport emphasize the involvement of a well-defined pore where the blockers could bind rather than a relatively flat protein surface that may not support strong and specific small molecular binding (73–75).

Further meta-dynamic simulations were performed to generate a large number of ion permeation events to probe possible ion pathways. The results show that ion and phospholipid permeation of mTMEM16F employ similar physical pathways on the intracellular side but follow diverged to exit to the extracellular side (Fig. 9). The extracellular vestibule walled by TM4–6 is lined with several polar and charged residues and is well hydrated, which seems to be the preferred exit route for ions once they cross over the inner gate region (Fig. 9 C). Interestingly, some blockers could inhibit both Cl<sup>-</sup> channel and scramblase activity of mTMEM16F, while other blockers show different inhibition effects toward ion and lipid translocation (73–75). These experimental observations support that ion and lipid pathways do not fully overlap. This also raises the question of whether ions might co-transport

with lipid headgroups (15,44). In the meta-dynamics simulations, even though the groove was fully occupied by lipid headgroups, only  $\text{Cl}^-$  permeation events were observed without any co-transportation of lipids. That is, the presence of lipid headgroups may facilitate the ion conduction by increasing hydrophilicity of the pore region, but the conduction of ions and lipids are not required to be coupled.

It has also been proposed that the ion conductive state in mTMEM16 scramblase is analogous to those of TMEM16 CaCCs such as the mTMEM16A chloride channel (7). However, mTMEM16F exhibits distinct ion conductance properties, such as the I-V curve of mTMEM16A being linear while that of mTMEM16F is outwardly rectifying (76,77). Also, unlike mTMEM16 CaCCs, mTMEM16F has been reported to transport cations such as  $\text{Na}^+$ ,  $\text{K}^+$ , and  $\text{Ca}^{2+}$  (77,78). Despite many similarities in sequence, structure, and activation mechanism, there are differences in details of conformational changes involved in activation of mTMEM16F and mTMEM16A. Previous simulations suggested that  $\text{PIP}_2$ -induced opening of the mTMEM16A pore mainly involves a lever-like movement of TM4, followed by dilation of the upper pore region and conformational changes in other TMs (39). The putative open pore of mTMEM16F found in our double charged mutant is wider than that of mTMEM16A, which is capable of accommodating larger substrates such as lipid headgroups and is less selective on substrate types. This is supported by the previous observation that a single inner gate mutation (L547K) activates novel lipid scramblase activity in mTMEM16A, which could be due to it bringing further dilation on the upper pore region (40). However, additional computational and experimental studies are needed to further resolve the molecular determinant of similarities and differences in activities among different TMEM16 family proteins. We also caution that the activation mechanism and open-state conformations revealed that using the current gain-of-function mutations may not fully reflect those of the WT protein.

## SUPPORTING MATERIAL

Supporting material can be found online at <https://doi.org/10.1016/j.bpj.2022.08.011>.

## AUTHOR CONTRIBUTIONS

Z.J. and J.C., conception and design of the study; Z.J. and J.H., performing the simulation and analysis; Z.J., J.H., and J.C., analysis and interpretation of data, drafting and revising the manuscript.

## ACKNOWLEDGMENTS

The authors thank Dr. Huanghe Yang for initial discussions that led to the conception of this study. All simulations were performed on the pikes GPU cluster housed in the Massachusetts Green High-Performance Computing

Cluster (MGHPCC). This work was supported by National Institutes of Health grant R35 GM144045 (J.C.).

## DECLARATION OF INTERESTS

The authors declare no competing interests.

## REFERENCES

- Balasubramanian, K., and A. J. Schroit. 2003. Aminophospholipid asymmetry: a matter of life and death. *Annu. Rev. Physiol.* 65:701–734.
- Pittoni, V., and G. Valesini. 2002. The clearance of apoptotic cells: implications for autoimmunity. *Autoimmun. Rev.* 1:154–161.
- Clarke, R. J., K. R. Hossain, and K. Cao. 2020. Physiological roles of transverse lipid asymmetry of animal membranes. *Biochim. Biophys. Acta Biomembr.* 1862:183382.
- Bevers, E. M., and P. L. Williamson. 2016. Getting to the outer leaflet: physiology of phosphatidylserine exposure at the plasma membrane. *Physiol. Rev.* 96:605–645.
- Sivagnanam, U., S. K. Palanirajan, and S. N. Gummadi. 2017. The role of human phospholipid scramblases in apoptosis: an overview. *Biochim. Biophys. Acta Mol. Cell Res.* 1864:2261–2271.
- Yang, H., A. Kim, ..., L. Y. Jan. 2012. TMEM16F forms a  $\text{Ca}^{2+}$ -activated cation channel required for lipid scrambling in platelets during blood coagulation. *Cell.* 151:111–122.
- Falzone, M. E., M. Malvezzi, ..., A. Accardi. 2018. Known structures and unknown mechanisms of TMEM16 scramblases and channels. *J. Gen. Physiol.* 150:933–947.
- Bevers, E. M., and P. L. Williamson. 2010. Phospholipid scramblase: an update. *FEBS Lett.* 584:2724–2730.
- Nagata, S., J. Suzuki, ..., T. Fujii. 2016. Exposure of phosphatidylserine on the cell surface. *Cell Death Differ.* 23:952–961.
- Suzuki, J., D. P. Denning, ..., S. Nagata. 2013. Xk-related protein 8 and CED-8 promote phosphatidylserine exposure in apoptotic cells. *Science.* 341:403–406.
- Suzuki, J., M. Umeda, ..., S. Nagata. 2010. Calcium-dependent phospholipid scrambling by TMEM16F. *Nature.* 468:834–838.
- Tian, Y., R. Schreiber, and K. Kunzelmann. 2012. Anoctamins are a family of  $\text{Ca}^{2+}$ -activated  $\text{Cl}^-$  channels. *J. Cell Sci.* 125:4991–4998.
- Whitlock, J. M., and H. C. Hartzell. 2017. Anoctamins/TMEM16 proteins: chloride channels flirting with lipids and extracellular vesicles. *Annu. Rev. Physiol.* 79:119–143.
- Williamson, P. 2015. Phospholipid scramblases. *Lipid Insights.* 8:41–44.
- Whitlock, J. M., and H. C. Hartzell. 2016. A Pore Idea: the ion conduction pathway of TMEM16/ANO proteins is composed partly of lipid. *Pflügers Archiv.* 468:455–473.
- Shi, S., C. Pang, ..., H. An. 2020. Recent progress in structural studies on TMEM16A channel. *Comput. Struct. Biotechnol. J.* 18:714–722.
- Pedemonte, N., and L. J. V. Galiotta. 2014. Structure and function of TMEM16 proteins (Anoctamins). *Physiol. Rev.* 94:419–459.
- Galiotta, L. J. V. 2009. The TMEM16 protein family: a new class of chloride channels? *Biophys. J.* 97:3047–3053.
- Piccollo, A., M. Malvezzi, and A. Accardi. 2015. TMEM16 proteins: unknown structure and confusing functions. *J. Mol. Biol.* 427:94–105.
- Kalienkova, V., V. Clerico Mosina, and C. Paulino. 2021. The groovy TMEM16 family: molecular mechanisms of lipid scrambling and ion conduction. *J. Mol. Biol.* 433:166941.
- Malvezzi, M., M. Chalal, ..., A. Accardi. 2013.  $\text{Ca}^{2+}$ -dependent phospholipid scrambling by a reconstituted TMEM16 ion channel. *Nat. Commun.* 4:2367–2369.

22. Scudieri, P., E. Caci, ..., L. J. V. Galletta. 2015. Ion channel and lipid scramblase activity associated with expression of TMEM16F/ANO6 isoforms. *J. Physiol.* 593:3829–3848.
23. Ousingsawat, J., P. Wanitchakool; ..., K. J. C. d. Kunzelmann, and disease. 2018. Contribution of TMEM16F to pyroptotic cell death. *Cell Death Dis.* 9:300–311.
24. van Kruchten, R., N. J. A. Mattheij, ..., E. M. Bevers. 2013. Both TMEM16F-dependent and TMEM16F-independent pathways contribute to phosphatidylserine exposure in platelet apoptosis and platelet activation. *Blood.* 121:1850–1857.
25. Fujii, T., A. Sakata, ..., S. Nagata. 2015. TMEM16F is required for phosphatidylserine exposure and microparticle release in activated mouse platelets. *Proc. Natl. Acad. Sci. USA.* 112:12800–12805.
26. Ehlen, H. W. A., M. Chinenkova, ..., A. Vorkamp. 2013. Inactivation of anoctamin-6/Tmem16f, a regulator of phosphatidylserine scrambling in osteoblasts, leads to decreased mineral deposition in skeletal tissues. *J. Bone Miner. Res.* 28:246–259.
27. Zaitseva, E., E. Zaitsev, ..., L. V. Chernomordik. 2017. Fusion stage of HIV-1 entry depends on virus-induced cell surface exposure of phosphatidylserine. *Cell Host Microbe.* 22:99–110.e7.
28. Younan, P., M. Iampietro, ..., A. Bukreyev. 2018. Role of transmembrane protein 16F in the incorporation of phosphatidylserine into budding Ebola virus virions. *J. Infect. Dis.* 218:S335–S345.
29. Zwaal, R. F. A., P. Comfurius, and E. M. Bevers. 2004. Scott syndrome, a bleeding disorder caused by defective scrambling of membrane phospholipids. *Biochim. Biophys. Acta.* 1636:119–128.
30. Castoldi, E., P. W. Collins, ..., E. M. Bevers. 2011. Compound heterozygosity for 2 novel TMEM16F mutations in a patient with Scott syndrome. *Blood.* 117:4399–4400.
31. Paulino, C., V. Kalienkova, ..., R. Dutzler. 2017. Activation mechanism of the calcium-activated chloride channel TMEM16A revealed by cryo-EM. *Nature.* 552:421–425.
32. Alvadia, C., N. K. Lim, ..., C. Paulino. 2019. Cryo-EM structures and functional characterization of the murine lipid scramblase TMEM16F. *Elife.* 8:e44365.
33. Feng, S., S. Dang, ..., Y. Cheng. 2019. Cryo-EM studies of TMEM16F calcium-activated ion channel suggest features important for lipid scrambling. *Cell Rep.* 28:1385–1579.e564.
34. Brunner, J. D., N. K. Lim, ..., R. Dutzler. 2014. X-ray structure of a calcium-activated TMEM16 lipid scramblase. *Nature.* 516:207–212.
35. Dang, S., S. Feng, ..., L. Y. Jan. 2017. Cryo-EM structures of the TMEM16A calcium-activated chloride channel. *Nature.* 552:426–429.
36. Falzone, M. E., J. Rheinberger, ..., A. Accardi. 2019. Structural basis of Ca<sup>2+</sup>-dependent activation and lipid transport by a TMEM16 scramblase. *Elife.* 8:e43229.
37. Bushell, S. R., A. C. W. Pike, ..., E. P. Carpenter. 2019. The structural basis of lipid scrambling and inactivation in the endoplasmic reticulum scramblase TMEM16K. *Nat. Commun.* 10:3956.
38. Le, S. C., Z. Jia, ..., H. Yang. 2019. Molecular basis of PIP<sub>2</sub>-dependent regulation of the Ca(2+)-activated chloride channel TMEM16A. *Nat. Commun.* 10:3769.
39. Jia, Z., and J. Chen. 2021. Specific PIP<sub>2</sub> binding promotes calcium activation of TMEM16A chloride channels. *Commun. Biol.* 4:259.
40. Le, T., Z. Jia, ..., H. Yang. 2019. An inner activation gate controls TMEM16F phospholipid scrambling. *Nat. Commun.* 10:1846.
41. Kalienkova, V., V. Clerico Mosina, ..., C. Paulino. 2019. Stepwise activation mechanism of the scramblase nhTMEM16 revealed by cryo-EM. *Elife.* 8:e44364.
42. Kobayashi, T., and A. K. Menon. 2018. Transbilayer lipid asymmetry. *Curr. Biol.* 28:R386–R391.
43. Bethel, N. P., and M. Grabe. 2016. Atomistic insight into lipid translocation by a TMEM16 scramblase. *Proc. Natl. Acad. Sci. USA.* 113:14049–14054.
44. Jiang, T., K. Yu, ..., E. Tajkhorshid. 2017. Lipids and ions traverse the membrane by the same physical pathway in the nhTMEM16 scramblase. *Elife.* 6:e28671.
45. Watanabe, R., T. Sakuragi, ..., S. Nagata. 2018. Single-molecule analysis of phospholipid scrambling by TMEM16F. *Proc. Natl. Acad. Sci. USA.* 115:3066–3071.
46. Allhusen, J. S., and J. C. Conboy. 2017. The ins and outs of lipid flip-flop. *Acc. Chem. Res.* 50:58–65.
47. Malvezzi, M., K. K. Andra, ..., A. Accardi. 2018. Out-of-the-groove transport of lipids by TMEM16 and GPCR scramblases. *Proc. Natl. Acad. Sci. USA.* 115:E7033–E7042.
48. Falzone, M. E., Z. Feng, ..., A. Accardi. 2022. TMEM16 scramblases thin the membrane to enable lipid scrambling. *Nat. Commun.* 13:2604.
49. Sakuragi, T., R. Kanai, ..., S. Nagata. 2021. The tertiary structure of the human Xkr8–Basigin complex that scrambles phospholipids at plasma membranes. *Nat. Struct. Mol. Biol.* 28:825–834.
50. Straub, M. S., C. Alvadia, ..., R. Dutzler. 2021. Cryo-EM structures of the caspase-activated protein XKR9 involved in apoptotic lipid scrambling. *Elife.* 10:e69800.
51. Schwede, T., J. Kopp, ..., M. C. Peitsch. 2003. SWISS-MODEL: an automated protein homology-modeling server. *Nucleic Acids Res.* 31:3381–3385.
52. Lee, J., X. Cheng, ..., W. Im. 2016. CHARMM-GUI input generator for NAMD, GROMACS, AMBER, OpenMM, and CHARMM/OpenMM simulations using the CHARMM36 additive force field. *J. Chem. Theor. Comput.* 12:405–413.
53. Huang, J., S. Rauscher, ..., A. D. MacKerell, Jr. 2017. CHARMM36m: an improved force field for folded and intrinsically disordered proteins. *Nat. Methods.* 14:71–73.
54. Klauda, J. B., R. M. Venable, ..., R. W. Pastor. 2010. Update of the CHARMM all-atom additive force field for lipids: validation on six lipid types. *J. Phys. Chem. B.* 114:7830–7843.
55. Hess, B., C. Kutzner, ..., E. Lindahl. 2008. Gromacs 4: algorithms for highly efficient, load-balanced, and scalable molecular simulation. *J. Chem. Theor. Comput.* 4:435–447.
56. Abraham, M. J., T. Murtola, ..., E. Lindahl. 2015. GROMACS: high performance molecular simulations through multi-level parallelism from laptops to supercomputers. *SoftwareX.* 1–2:19–25.
57. Darden, T., D. York, and L. Pedersen. 1993. Particle mesh Ewald: an  $N \log(N)$  method for Ewald sums in large systems. *J. Chem. Phys.* 98:10089–10092.
58. Ryckaert, J.-P., G. Ciccotti, and H. J. Berendsen. 1977. Numerical integration of the cartesian equations of motion of a system with constraints: molecular dynamics of n-alkanes. *J. Comput. Phys.* 23:327–341.
59. Nosé, S. 1984. A unified formulation of the constant temperature molecular dynamics methods. *J. Chem. Phys.* 81:511–519.
60. Hoover, W. G. 1985. Canonical dynamics: equilibrium phase-space distributions. *Phys. Rev. A Gen. Phys.* 31:1695–1697.
61. Parrinello, M., and A. Rahman. 1981. Polymorphic transitions in single crystals: a new molecular dynamics method. *J. Appl. Phys.* 52:7182–7190.
62. Torrie, G. M., and J. P. Valleau. 1977. Non-physical sampling distributions in Monte-carlo free-energy estimation - umbrella sampling. *J. Comput. Phys.* 23:187–199.
63. Kumar, S., J. M. Rosenberg, ..., P. A. Kollman. 1992. THE weighted histogram analysis method for free-energy calculations on biomolecules. I. The method. *J. Comput. Chem.* 13:1011–1021.
64. Barducci, A., G. Bussi, and M. Parrinello. 2008. Well-tempered metadynamics: a smoothly converging and tunable free-energy method. *Phys. Rev. Lett.* 100:020603.
65. Tribello, G. A., M. Bonomi, ..., G. Bussi. 2014. Plumed 2: new feathers for an old bird. *Comput. Phys. Commun.* 185:604–613.
66. Humphrey, W., A. Dalke, and K. Schulten. 1996. VMD: visual molecular dynamics. *J. Mol. Graph.* 14:33–38.

67. Smart, O. S., J. G. Neduvilil, ..., M. S. Sansom. 1996. HOLE: a program for the analysis of the pore dimensions of ion channel structural models. *J. Mol. Graph.* 14:354–360.
68. Ye, W., T. W. Han, ..., L. Y. Jan. 2018. Phosphatidylinositol-(4, 5)-bisphosphate regulates calcium gating of small-conductance cation channel TMEM16F. *Proc. Natl. Acad. Sci. USA.* 115:E1667–E1674.
69. Aoun, J., M. Hayashi, ..., K. M. Hoque. 2016. Anoctamin 6 contributes to Cl<sup>-</sup> secretion in accessory cholera enterotoxin (Ace)-stimulated diarrhea: an essential role for phosphatidylinositol 4, 5-bisphosphate (PIP<sub>2</sub>) signaling in cholera. *J. Biol. Chem.* 291:26816–26836.
70. Lee, B.-C., G. Khelashvili, ..., A. Accardi. 2018. Gating mechanism of the extracellular entry to the lipid pathway in a TMEM16 scramblase. *Nat. Commun.* 9:3251.
71. Kunzelmann, K., B. Nilius, ..., J. W. M. Heemskerk. 2014. Molecular functions of anoctamin 6 (TMEM16F): a chloride channel, cation channel, or phospholipid scramblase? *Pflügers Archiv.* 466:407–414.
72. Kostritskii, A. Y., and J.-P. Machtens. 2021. Molecular mechanisms of ion conduction and ion selectivity in TMEM16 lipid scramblases. *Nat. Commun.* 12:2826.
73. Suzuki, T., J. Suzuki, and S. Nagata. 2014. Functional swapping between transmembrane proteins TMEM16A and TMEM16F. *J. Biol. Chem.* 289:7438–7447.
74. Han, L., Y. Miao, ..., X. Wang. 2021. The binding of autotaxin to integrins mediates hyperhomocysteinemia-potentiated platelet activation and thrombosis. *Blood Adv.* 6:46–61.
75. Öhlinger, T., E. W. Müllner, ..., U. Salzer. 2020. Lysophosphatidic acid-induced pro-thrombotic phosphatidylserine exposure and ionophore-induced microvesiculation is mediated by the scramblase TMEM16F in erythrocytes. *Blood Cells Mol. Dis.* 83:102426.
76. Nguyen, D. M., L. S. Chen, ..., T.-Y. Chen. 2019. Comparison of ion transport determinants between a TMEM16 chloride channel and phospholipid scramblase. *J. Gen. Physiol.* 151:518–531.
77. Shimizu, T., T. Iehara, ..., Y. Okada. 2013. TMEM16F is a component of a Ca<sup>2+</sup>-activated Cl<sup>-</sup> channel but not a volume-sensitive outwardly rectifying Cl<sup>-</sup> channel. *Am. J. Physiol. Cell Physiol.* 304:C748–C759.
78. Ye, W., T. W. Han, ..., L. Y. Jan. 2019. Dynamic change of electrostatic field in TMEM16F permeation pathway shifts its ion selectivity. *Elife.* 8:e45187.

**Biophysical Journal, Volume 121**

**Supplemental information**

**Activation of TMEM16F by inner gate charged mutations and possible  
lipid/ion permeation mechanisms**

**Zhiguang Jia, Jian Huang, and Jianhan Chen**

**Supplementary Information**

**Activation of TMEM16F by Inner Gate Charge Mutations and  
Mechanisms of Lipid and Ion Permeation**

*Zhiguang Jia<sup>1,#</sup>, Jian Huang<sup>1,#</sup>, and Jianhan Chen<sup>1,2\*</sup>*

<sup>1</sup>Department of Chemistry

and

<sup>2</sup>Department of Biochemistry and Molecular Biology

University of Massachusetts

Amherst, MA 01003, USA

# Equal Contributions: Zhiguang Jia, Jian Huang

\* Corresponding Author: Jianhan Chen, Phone: (413) 545-3386, Email: [jianhanc@umass.edu](mailto:jianhanc@umass.edu)

## Supplementary Tables

**Table S1. Summary of atomistic simulations of TMEM16A**

| Systems             | Mutations  | Initial Structure         | Length ( $\mu$ s)                            |
|---------------------|------------|---------------------------|----------------------------------------------|
| <i>sim 1-3</i>      | wt         | 6qp6                      | 1.0 each                                     |
| <i>sim 4-6</i>      | F518K      | 6qp6                      | 2.5 each                                     |
| <i>sim 7-9</i>      | Y563K      | 6qp6                      | 2.5 each                                     |
| <i>sim 10-12</i>    | F518KY563K | 6qp6                      | 4.0 each                                     |
| <i>sim 13-15</i>    | wt         | <i>sim 10</i> , 4 $\mu$ s | 1.0 each                                     |
| <i>Meta 1 and 2</i> | wt         | <i>sim 13</i> , 150 ns    | 0.4 each                                     |
| <i>US 1 and 2</i>   | wt         | <i>sim 10</i>             | 0.04 per window (0.44 total for each UM run) |
| <i>US 3 and 4</i>   | F518KY563K | <i>sim 10</i>             | 0.04 per window (0.44 total for each UM run) |



**Table S2. TM helix tilt angles in the closed (wt) and open (F518K/Y563K) states of TMEM16F.** All average values and standard deviations were calculated from last 500 ns of sim 1-3 (wt) or sim 10-12 (F518K/Y563K).

|             | <b>TM1</b> | <b>TM2</b> | <b>TM3</b> | <b>TM4</b> | <b>TM5</b>  |
|-------------|------------|------------|------------|------------|-------------|
| wt          | 26.2±2.4   | 5.7±2.5    | 42.5±2.5   | 38.0±2.2   | 18.4±1.8    |
| F518K/Y563K | 26.1±3.8   | 7.3±3.5    | 42.1±3.3   | 39.6±3.6   | 18.2±3.3    |
|             | <b>TM6</b> | <b>TM7</b> | <b>TM8</b> | <b>TM9</b> | <b>TM10</b> |
| wt          | 35.9±1.2   | 33.7±2.0   | 32.2±1.3   | 11.8±2.3   | 17.5±2.3    |
| F518K/Y563K | 36.2±1.7   | 33.6±2.4   | 31.6±1.9   | 13.2±1.4   | 17.6±3.4    |

## Supplementary Movies

**Movie S1:** Spontaneous pore opening of the  $\text{Ca}^{2+}$ -bound mTMEM16F F518K/Y563F mutant. The movie was generated based on *sim10*. Chain A is shown in the front view by cartoons with TMs 3-6 colored in yellow, red, blue and green, respectively, and the other TMs in cyan. The phosphate atoms in lipid headgroups are represented as transparent orange spheres. The two bound  $\text{Ca}^{2+}$  ions are shown as two red spheres. The inner gate residues, K518, K563 and I612, are shown as yellow sticks. Note that, as the pore opens up, it becomes fully occupied with lipid headgroups.

**Movie S2:** A spontaneous lipid translocation event observed in mTMEM16f F518K/Y563K mutant simulation (*sim 12*). Chain A is shown in the front view. TMs, phosphate atoms and inner gate residues are shown in sticks and colored according to atom types. The phosphate atoms of the passing lipid are shown with larger orange spheres, while the tail is shown in stick.

**Movie S3:** A representative ion permeation event sampled during metadynamics simulations of wt protein of mTMEM16F. Chain A is shown in the front view and elements, such as TMs, phosphate atoms and inner gate residues, are presented with the same scheme as in Movie S1. The passing chloride ion is shown as a green sphere along with its hydration shell. Note that the ion resides in the intracellular and extracellular vestibules for extended periods before and after crossing the hydrophobic inner gate region (the major free energy barrier).

## Supplementary Figures

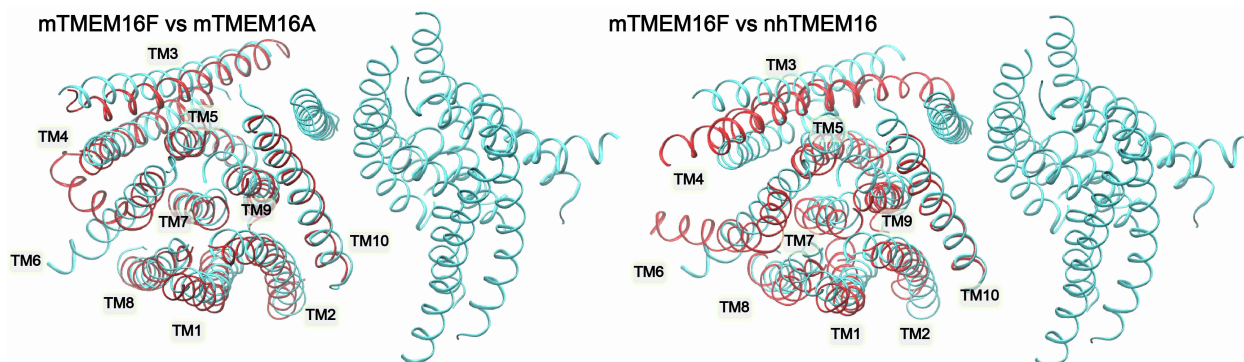

**Fig. S1** Comparison of TM arrangement between mTMEM16F and other TMEM16 proteins. Top views of the  $\text{Ca}^{2+}$ -bound mTMEM16F (PDB: 6QP6, cyan cartoon,) superimposed on the  $\text{Ca}^{2+}$ -bound TMEM16A (PDB: 5OYB) (left, red cartoon) and the  $\text{Ca}^{2+}$ -bound nhTMEM16 (PDB: 4WIS) (right, red cartoon). Both structural alignments are based on the backbone of TM1-3 and TM7-10.

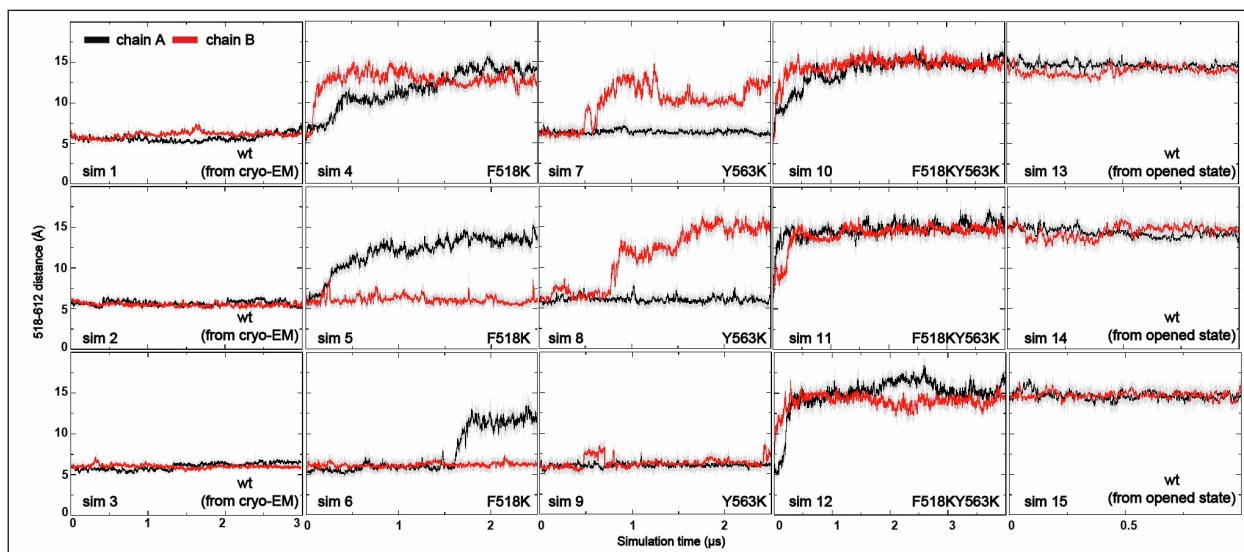

**Fig. S2** Ca distance between inner gate residues 518 and 612 in various simulations (Table S1). All traces plot 2.5 ns (50 frame) running averages for clarity and the raw data (recorded every 50 ps) are represented as gray lines.

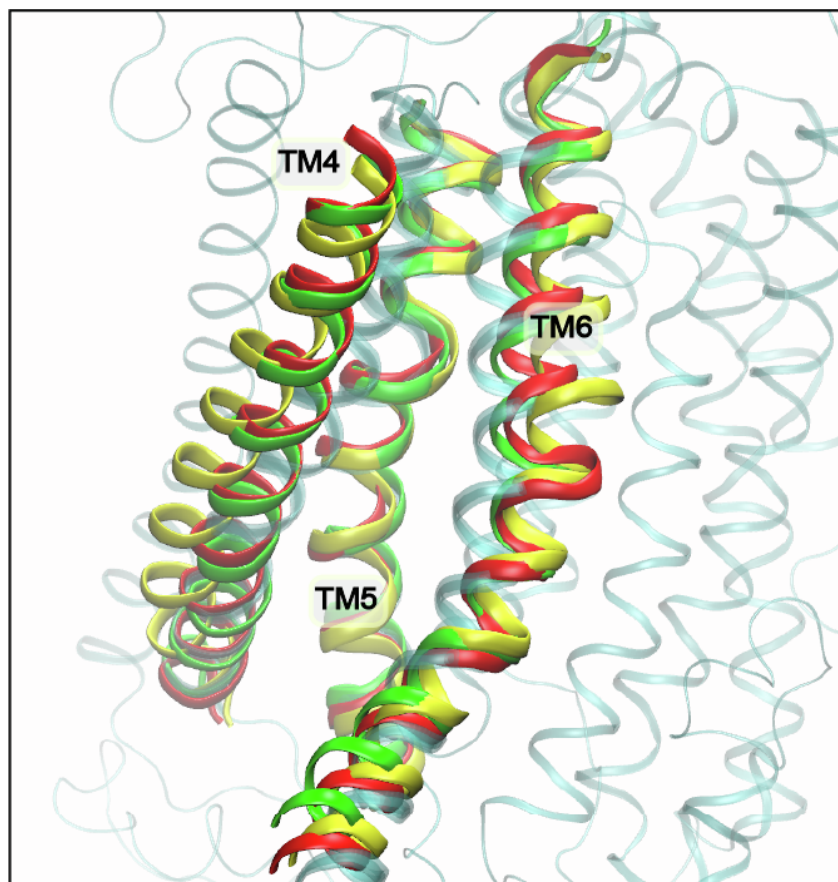

**Fig. S3** Superposition of the pore region in representative fully open states of F518K (red), Y563K (green) and F518K/Y563K (yellow) mutants. The last snapshots from trajectories *sim* 4 (chain A), 8 (chain A) and 10 (chain A) are used, as they represent the most dilated pore conformations sampled for each mutant (see Fig. S2).

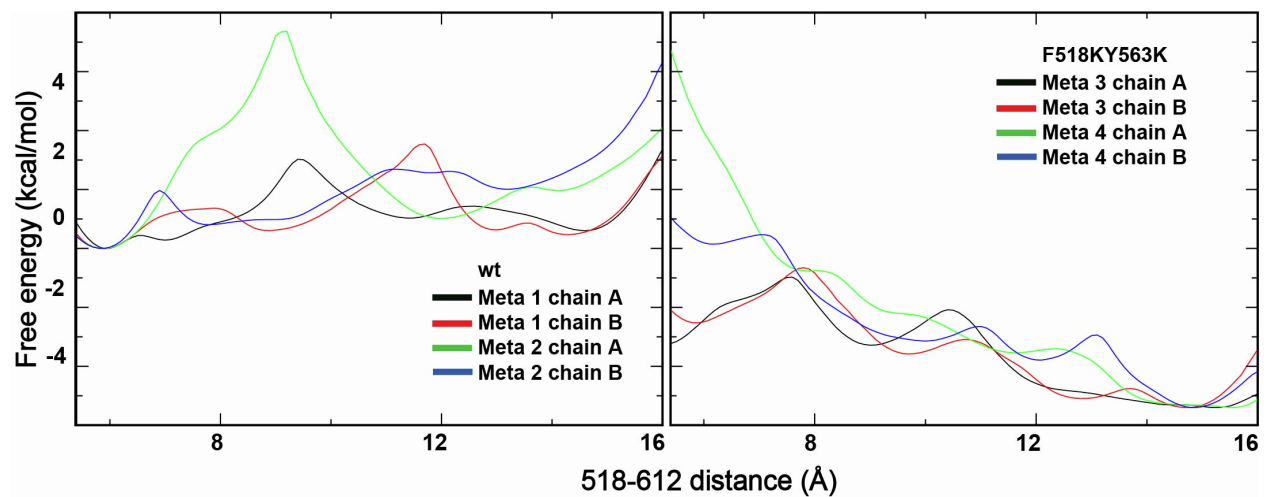

**Fig. S4** Individual free energy profiles of pore opening of the mTMEM16F wt and F518K/Y563K mutant along the distance between  $C\alpha$  atoms of inner gate residues 518 and 612 (Table S1).

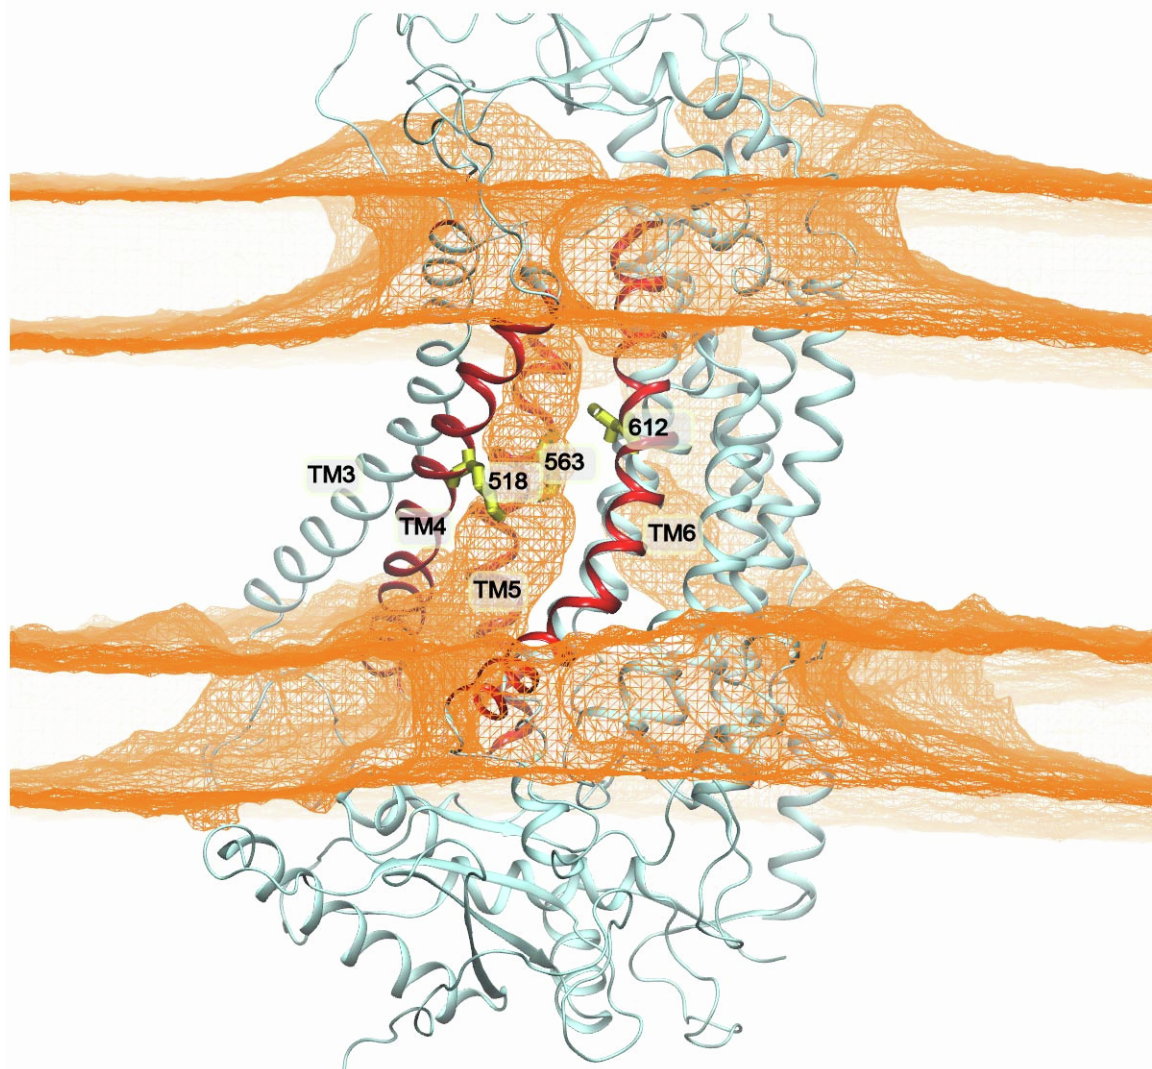

**Fig. S5** The 3D density map of lipid phosphate group. Isovalue equals to  $0.001 \text{ atom}/\text{\AA}^3$ . The lipid density map was calculated by using 2-4  $\mu\text{s}$  segment of the trajectory from *sim 10*.
